# Supplementary material for: In vivo cancer targeting and fluorescence-CT dual-mode imaging with nanoprobes based on silver sulfide quantum dots and iodinated oil
Source: Royal Society of Chemistry journal article supplement (doi:10.1039/c5nr05620a), 2015-01-01
Supplement: c5nr05620a1.pdf [file c5nr05620a1.pdf]

## Supporting Information

*In vivo* cancer targeting and fluorescence-CT dual-modal imaging  
with nano-probe based on silver sulfide quantum dots and iodinate oil

*Meng-Yao Qin*<sup>‡</sup>, *Xiao-Quan Yang*<sup>‡</sup>, *Kan Wang*, *Xiao-Shuai Zhang*, *Ji-Tao Song*, *Ming-Hao  
Yao*, *Dong-Mei Yan*, *Bo Liu*\* and *Yuan-Di Zhao*\*

Britton Chance Center for Biomedical Photonics at Wuhan National Laboratory for  
Optoelectronics - Hubei Bioinformatics & Molecular Imaging Key Laboratory, Department of  
Biomedical Engineering, College of Life Science and Technology, Huazhong University of  
Science and Technology, Wuhan 430074, P. R. China

\* Corresponding author.

Tel./Fax: +86 27-8779-2202.

Email address: zydi@mail.hust.edu.cn (Y. D. Zhao); lbyang@mail.hust.edu.cn (B. Liu)

<sup>‡</sup> These authors equally contributed to this article.

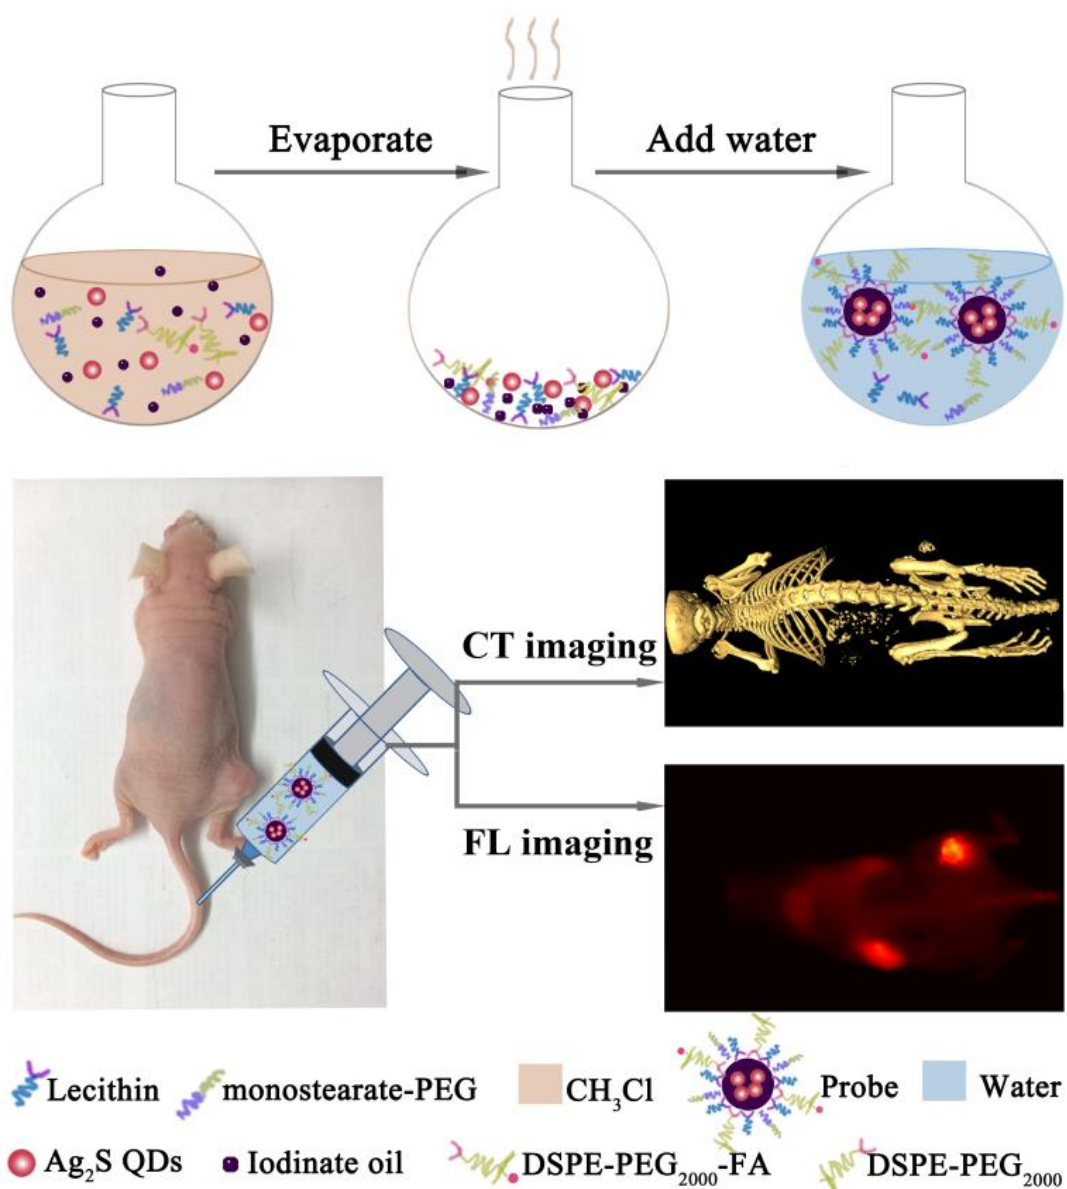

**Figure S1.** Schematic illustration of Ag<sub>2</sub>S-I@DSPE-PEG<sub>2000</sub>-FA for *in vivo* X-ray CT and fluorescence dual mode imaging.

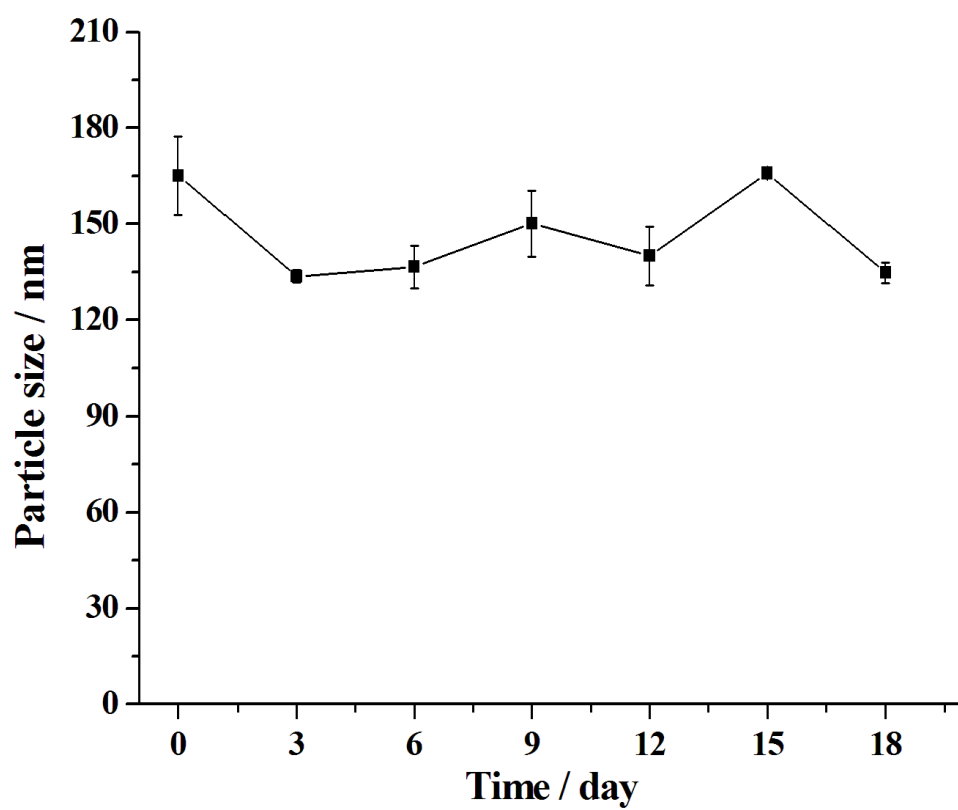

**Figure S2** Changes in mean particle size of Ag<sub>2</sub>S-I@DSPE-PEG<sub>2000</sub>-FA during storage at 4 °C.

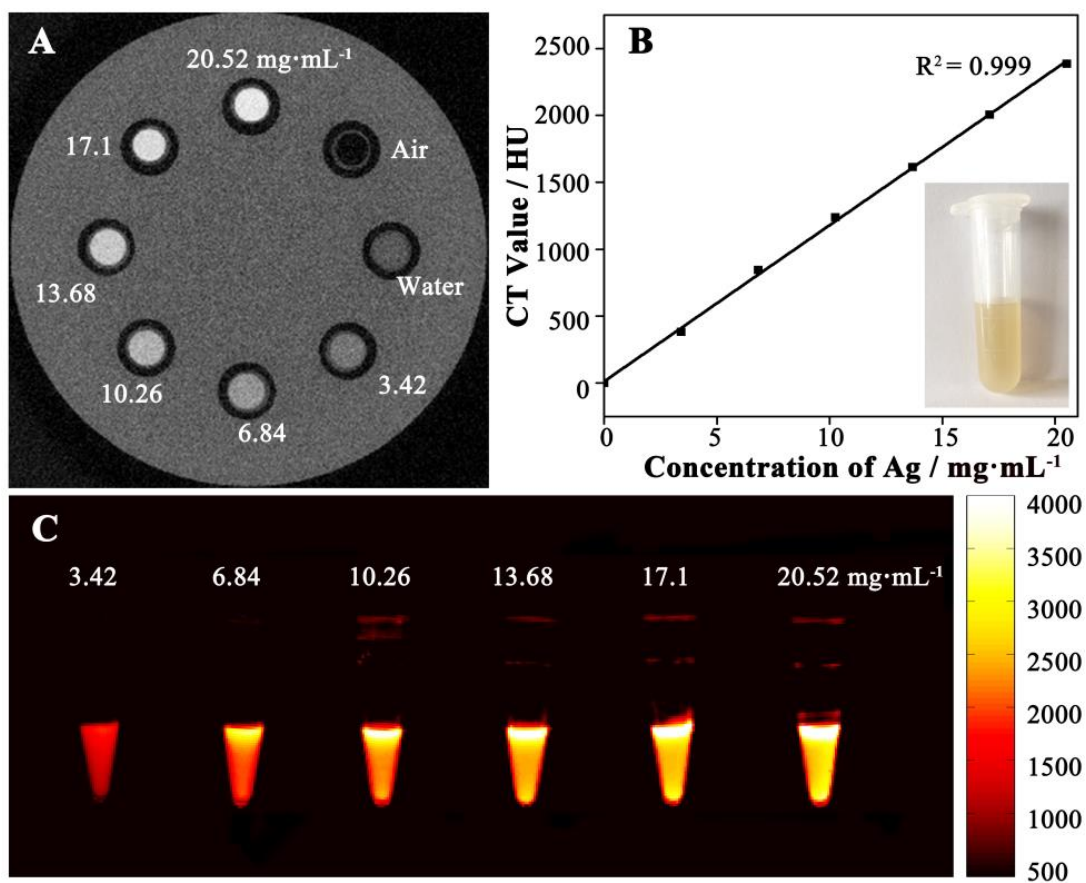

**Figure S3.** CT-fluorescence imaging of Ag<sub>2</sub>S-I@DSPE-PEG<sub>2000</sub>-FA probe of different concentrations. Sectional view of CT imaging (A); linear relationship between the HU value and concentration of the probe, the Insert was its white map (B); overall fluorescence image(C).

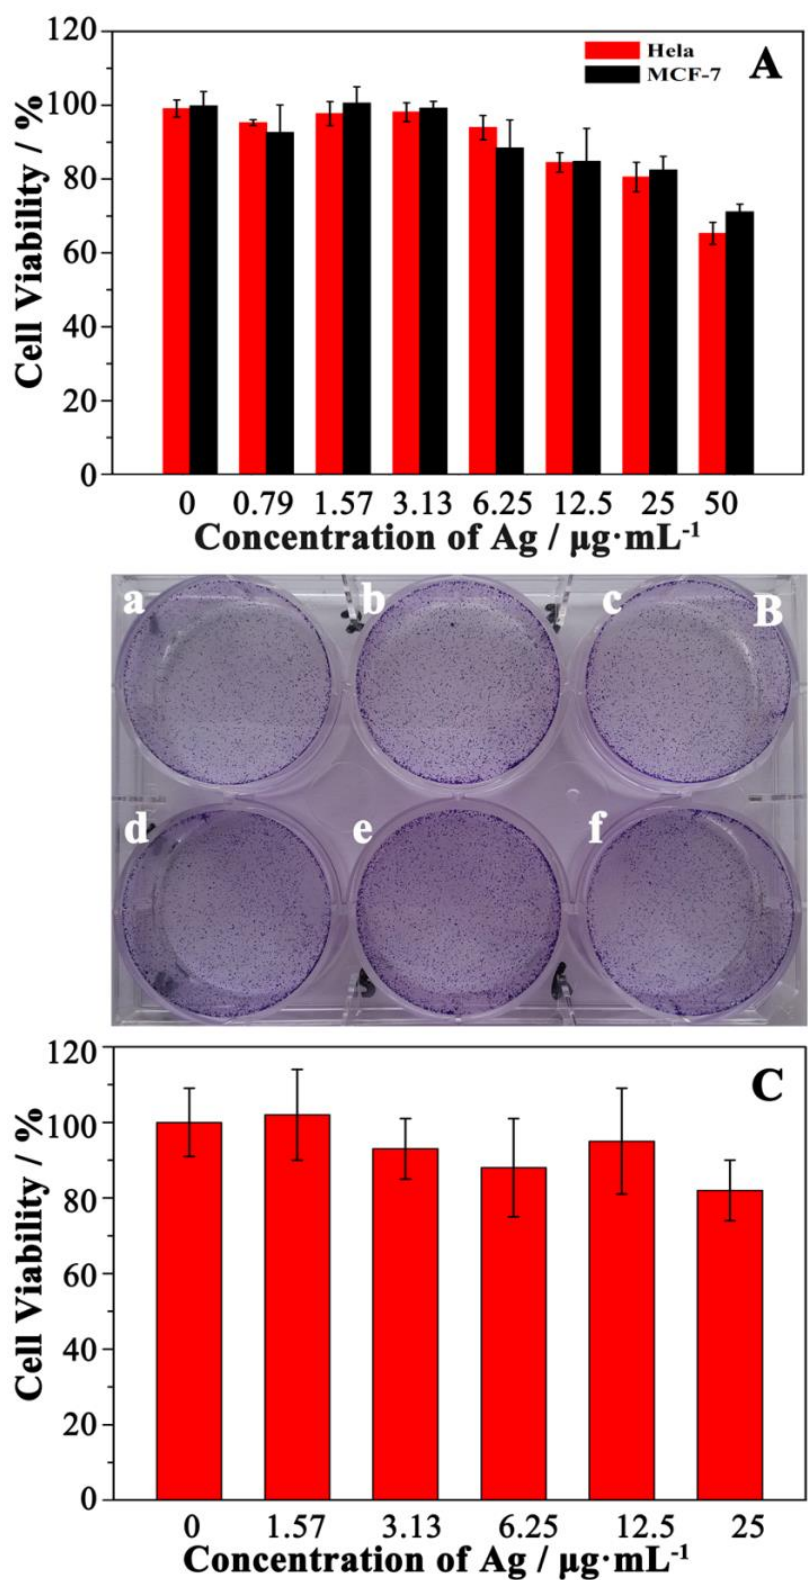

**Figure S4.** Cytotoxicity of  $\text{Ag}_2\text{S-I@DSPE-PEG}_{2000}\text{-FA}$  with different concentrations (0, 1.57, 3.13, 6.25, 12.5 and 25  $\mu\text{g}/\text{mL}$  Ag). MTT assay of HeLa and MCF-7 cells (A); Colony Formation Assay of HeLa cells (B); statistics results of colonies in Colony Formation Assay (C).

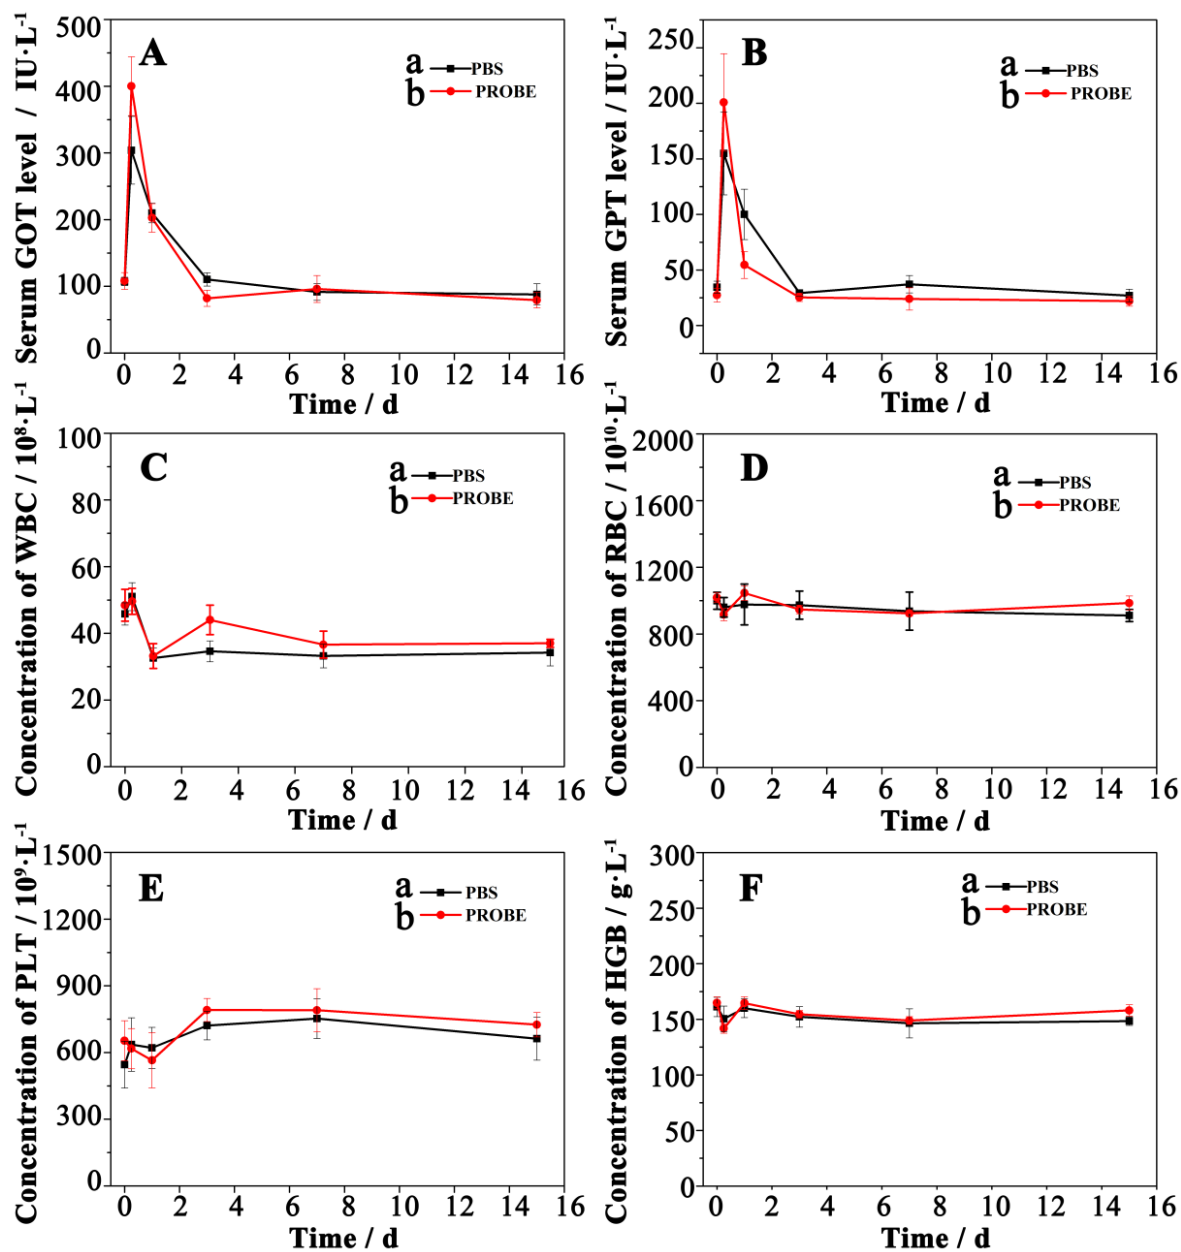

**Figure S5.** Analysis of blood samples of mice after injecting Ag<sub>2</sub>S-I@DSPE-PEG<sub>2000</sub>-FA (n=5). A: GOT; B: GPT; C: WBC; D: RBC; E: PLT; F: HGB. a: control group injected with PBS; b: experimental group with probe.
